# Supplementary material for: Mixed 2-phenylpyridine and 5-substitued-8-hydroxyquinolines palladium(ii) complexes: new emitters in solutions at room temperatureElectronic supplementary information (ESI) available: experimental details. See http://www.rsc.org/suppdata/cc/b3/b304812h/
Source: Royal Society of Chemistry journal article supplement (doi:10.1039/b304812h), 2003-01-01
Supplement: b304812h.doc [file b304812h.doc]

**Supplementary data**

**Mixed 2-phenylpyridine and 5-substituted-8-hydroxyquinolines palladium(II) complexes:**

**new emitters in solutions at room temperature**

Mauro Ghedini,*a Iolinda Aielloa, Massimo La Dedaa and Annarita Grisoliaa

*a LASCAMM, Unità INSTM della Calabria, Dipartimento di Chimica, Università degli Studi della Calabria, I-87036 Arcavacata di Rende (CS), Italy. Fax:+39(0)984 492062; Tel: +39(0)984 492062; E-mail: m.ghedini@unical.it*

**Experimental Section**

**General Procedures.** 8-Hydroxyquinoline and dodecylamine were used as received from Aldrich. The ligands 5-dodecynoylamino-8-hydroxyquinoline hydrochloride, **II**,1 and 5-formyl-8-hydroxyquinoline, **III**,2 and the complex [(Phpy)Pd(**-OAc)]23 were prepared according to the literature. Spectrofluorimetric grade solvents (Acros Organics) were used for the photophysical investigations.

1H NMR spectra in CDCl3 or CH3OD were recorded with a Bruker AC 300 spectrometer, at ambient probe temperature with TMS as the internal reference. IR spectra were runned with Perkin-Elmer Spectrum One FT-IR spectrometer equipped for reflectance measurements. Elemental analyses were performed with a Perkin-Elmer 2400 analyzer. The thermal behaviour was monitored with a Zeiss Axioscope polarizing microscope equipped with a Linkam C0 600 heating stage.

Absorption spectra were recorded with a Perkin-Elmer Lambda 900 spectrophotometer; corrected emission and excitation spectra were obtained with a Perkin-Elmer LS-50B spectrofluorimeter equippedwith a Hamamatsu R928 photomultiplier tube. Luminescence quantum yields were obtained by using the optically dilute method4 utilising [Ru(bipy)3]Cl2 (bipy=2,2’-bipyridine; =0.028 in aerated aqueous solution5) as the standard.

Experimental errors were as follows: absorption and emission maxima, ±2 nm; molar absorption coefficients, 10%; luminescence quantum yields 20%.

**Synthesis of ligands IV and V**

Ligands **IV** and **V** was obtained according to a procedure previously described for analogous ligand.6

**Preparation of 5-[(dodecyliminomethyl]-8-hydroxyquinoline, IV.** Dodecylamine (268 mg, 0.144 mmol) was dissolved in hot ethanol (10 ml) and added to a suspension of 5-formyl-8-hydroxyquinoline (250 mg, 0,144 mmol) in ethanol (5 ml). The red solution, which was formed by the time the addition, was stirred at reflux for 30min. The resulting mixture was cooled to room temperature, forming a cream-coloured precipitate. The solid was filtered, washed with ethanol and recrystallized from acetone (0.286 mg, 58%). M.p. 103 °C. 1H NMR (CDCl3):  (ppm) 9.73 (dd, 1H, H4), 8.80 (dd, 1H, H2), 8.59 (s, 1H, -*CH*=N-), 7.68 (d, 1H, H6), 7.54 (dd, 1H, H3), 7.18 (d, 1H, H7), 3.65 (t, 2H, -N-*CH2*-), 1.74 (q, 2H, N-CH2-*CH2*-), 1.38-1.25 (m, 18H, H aliphatic), 0.87 (t, 3H, -CH3). IR (KBr):  (cm-1) 3308, 2916, 2849, 1647, 1616, 1577, 1511, 1483, 1468, 1422, 1379, 1289, 1238, 1152, 959, 836, 786, 708, 675. Anal. Calcd. for C22H32N2O: C, 77.60; H, 9.47; N, 8.33. Found: C, 77.93; H, 9.26; N, 7.62.

**Preparation of 5-[(dodecylaminomethyl]-8-hydroxyquinoline, V.** Sodium borohydride (17 mg, 0.044 mmol) was added to **IV** (250 mg, 0.073 mmol) in ethanol (15 ml). After stirring (5h) at room temperature, the solvent was removed under reduced pressure. The resulting brownish solid was suspended in acetone and filtered. The solid was washed with a small amount of water, acetone and dried *in vacuo*. (195 mg, 78%). M.p. 76 °Cdec.. 1H NMR (CH3OD):  (ppm) 8.70 (d, 1H, H2), 8.38 (d, 1H, H4), 7.36 (m, 2H, H3 and H6), 6.90 (d, 1H, H7), 4.03 (s, 2H, -*CH2*-NH), 3.30 (t, 2H, -NH-*CH2*-), 1.51-0.89 (m, 23H, H aliphatic). IR (KBr):  (cm-1) 3326, 2921, 2851, 1575, 1510, 1470, 1423, 1374, 1278, 1223, 1125, 837, 784. Anal. Calcd. for C22H34N2O: C, 77.14; H, 10.00; N, 8.18. Found: C, 77.26; H, 9.96; N, 8.15.

**Figure 1.** Chemical structures and aromatic proton numbering scheme of the ligands **I**-**V**.

**Synthesis of complexes 1-5.**

Since the synthesis of the palladium complexes **1**-**5** used similar procedures, the synthesis of complex **1** is described as a general method.

**Preparation of (Phpy)Pd(Q), 1.** Sodium hydroxide (38 mg, 0.94 mmol) and of 8-hydroxyquinoline (72 mg, 0.47 mmol) were dissolved in hot ethanol (10 ml) and added to a suspension of [(PyPh)Pd(**-OAc)]2 (0.15 mg, 0.23 mmol) in 10 ml of ethanol. The resulting dark suspension was stirred at room temperature for 5h. The solid formed was filtered, suspended in chloroform and filtered through Celite. The solvent was removed under reduced pressure and the analytically pure product was obtained as a brown solid upon recrystallization from chloroform/ethanol (0.10 mg, 53%). M.p. 261°Cdec.. 1H NMR (CDCl3):  (ppm) 9.13 (d, 1H, H4), 8.89 (d, 1H, H6’), 8.27 (d, 1H, H2), 7.85 (td, 1H, H4’), 7.70 (d, 1H, H3’), 7.55-7.43 (m, 3H, H3, H6 and H5’), 7.30-7.17 (m, 4H, H8’, H9’ H10’ and H11’), 7.08 (d, 1H, H5), 6.95 (d, 1H, H7). IR (KBr):  (cm-1) 1604, 1569, 1499, 1465, 1379, 1325, 1112, 813, 740, 723. Anal. Calcd. for C20H14N2OPd: C, 59.35; H, 3.49; N, 6.92. Found: C, 59.17; H, 3.53; N, 6.85.

**Preparation (Phpy)Pd(Q’NHCO(CH2)10CH3), 2.** Brick red **s**olid. Yield 65% (183 mg). M.p. 235°Cdec.. 1H NMR (CDCl3):  (ppm) 8.87 (d, 1H, H6’), 8.60 (d, 1H, H2), 7.88 (d, 1H, H4), 7.77-7.63 (m, 2H, H3’ and H4’), 7.47 (d, 1H, H3), 7.34 (t, 1H, H5’), 7.14 (d, 1H, H6), 7.10-7.00 (m, 4H, H8’, H9’, H10’ and H11’), 6.72 (d, 1H, H7), 2.33 (t, 2H, CO-*CH2*), 1.70-1.21 (m, 18H, H aliphatic), 0.90 (t, 3H, CH3,). IR (KBr):  (cm-1) 3259, 2922, 2852, 1645, 1605, 1573, 1504, 1467, 1380, 1330, 1102, 824, 749, 727. Anal. Calcd. for C32H37N3O2Pd: C, 63.84; H, 6.19; N, 6.98. Found: C, 63.30; H, 6.63; N, 7.27.

**Preparation of (Phpy)Pd(Q’CHO), 3.** Yellow orange solid. Yield 95% (320 mg). M.p. 257 °Cdec.. IR (KBr):  (cm-1) 2832, 2710, 1655, 1607, 1560, 1516, 1484, 1398, 1370, 1345, 1248, 1208, 1149, 1108, 1061, 1021, 826, 778, 733, 649, 593. Anal. Calcd. for C21H14N2O2Pd: C, 58.28; H, 3.26; N, 6.47. Found: C, 59.37; H, 3.65; N, 6.25. No 1H NMR was performed due to insolubility of **3** in common solvents.

**Preparation of (Phpy)Pd(Q’CHN(CH2)11CH3), 4.** Brick red solid. Yield 81% (227 mg). M.p. 187 °Cdec.. 1H NMR (CDCl3): 10.03 (d, 1H, H4), 9.01 (d, 1H, H6’), 8.84 (d, 1H, H2, 5.10), 8.51 (s, 1H, -*CH*=N-), 7.79 (t, 1H, H4’), 7.64-7.61 (m, 2H, H3’ and H6), 7.53-7.12 (m, 6H, H3, H5’, H8’, H9’, H10’ and H11’), 6.96 (d, 1H, H7), 3.60 (t, 2H, -N-*CH2*), 1.74-1.26 (m, 20H, H aliphatic), 0.88 (t, 3H, CH3). IR (KBr):  (cm-1) 2923, 2853, 1634, 1562, 1509, 1470, 1336, 1246, 1109, 819, 725, 640. Anal. Calcd. for C33H39N3OPd: C, 66.05; H, 6.55; N, 7.00. Found: C, 66.44; H, 6.63; N, 6.92.

**Preparation of (Phpy)Pd(Q’CH2NH(CH2)11CH3), 5.** Brick red solid. Yield 56% (103 mg). M.p. 108 °Cdec.. 1H NMR (CDCl3): 9.09 (d, 1H, H6’), 8.88 (d, 1H, H2), 8.65 (d, 1H, H4), 7.82 (t, 1H, H4’), 7.66 (d, 1H, H3’), 7.52-7.44 (m, 2H, H3 and H5’), 7.38 (d, 1H, H6), 7.25-7.16 (m, 4H, H8’, H9’ H10’and H11’), 6.96 (d, 1H, H7), 4.05 (s, 2H, -*CH2*-NH), 2.68 (t, 2H, -NH-*CH2*) 1.90-1.19 (m, 20H, H aliphatic), 0.87 (t, 3H, CH3). IR (KBr):  (cm-1) 2922, 2852, 1605, 1572, 1508, 1466, 1324, 1102, 820, 753, 728, 620, 516. Anal. Calcd. for C33H41N3OPd: C, 65.83; H, 6.86; N, 6.98. Found: C, 65.67; H, 6.72; N, 6.61.

**Scheme 1.** Synthesis and aromatic proton numbering scheme for complexes **1-5.**

**Photophysical Characterisation.** The photophysical data of the ligands, recorded from dichloromethane solutions at room temperature are reported in Table 1.

**Table 1** Photophysical data recorded from dichloromethane solutions at room temperature.

| **Compound** | **Abs: /nm(/M-1cm-1)** | **Em:**  **/nm** | PLQY **(%)** |
| --- | --- | --- | --- |
| Phpy | 250 (12200), 274(9800), 290(sh) | n.o.a | - |
| HQ, **I** | 240(68000), 316(2200) | 400 | 0.40b |
| HQ’-NH-CO-(CH2)10CH3  (in DMSO),ref.1 **II** | 334 (1760) | 470 | 22.0 |
| HQ’-CHO, **III** | 240(33100), 264(9900), 325(10200) | n.o. | - |
| HQ’-CH=N-(CH2)11CH3, **IV** | 335(8400) | n.o. | - |
| HQ’-CH2-NH-(CH2)11CH3, **V** | 327c | 440 | 1.00 b |

a Although a very weak emission at about 320 nm was detected the emission intensity was at the limit of instrument sensitivity, preventing reliable characterisation.

b Luminescence quantum yields were obtained by using 9,10-diphenylanthracene in degassed cyclohexane (=0.98ref. 7) as the standard.

c It was impossible to determine the molar extinction coefficient value because the low solubility of this compound in common organic solvents.

**REFERENCES**

1 M. Ghedini, M. La Deda, I. Aiello, A. Grisolia, *submitted*.

2 R. Clemo, R. Howe, *J. Chem. Soc.*, 1955, 3552.

3 I. Aiello, A. Crispini, M. Ghedini, M. La Deda, F. Barigelletti, *Inorg.Chim. Acta*, 2000, **308**, 121.

4 J. N. Demas, G. A. Crosby, *J. Phys. Chem.*, 1971, **75**, 991.

5 K. Nakamaru, *Bull. Chem. Soc. Jpn.*, 1982, **5**, 2697.

6 M. Ghedini, M. La Deda, I. Aiello, A. Grisolia, *J. Chem. Soc., Dalton Trans.*, 2002, 3406.

7 W. R. Ware, W. Rothman, *Chem. Phys. Letters,* 1976, **39**, 449.
